# Supplementary material
Source: HighWire-hosted journal article supplement (https://bmjpaedsopen.bmj.com/content/3/1/e000483)

**Supplementary material 1: Results of logistic regression models**

| Logistic Regression Models                            | EYFSP Total Score |                          |      | EYFSP 5 Item Sub-Score |                          |       |
|-------------------------------------------------------|-------------------|--------------------------|------|------------------------|--------------------------|-------|
|                                                       | Odds Ratio        | 95% Confidence Intervals |      | Odds Ratio             | 95% Confidence Intervals |       |
|                                                       |                   | Low                      | High |                        | Low                      | High  |
| <b><u>Univariate: EYFP score</u></b>                  |                   |                          |      |                        |                          |       |
| Not low EYSPF score (reference)                       |                   |                          |      |                        |                          |       |
| Low EYSFP score                                       | 23.7*             | 12.9                     | 43.8 | 39.9*                  | 21.6                     | 73.8  |
| <b><u>Multivariate: EYFP score and covariates</u></b> |                   |                          |      |                        |                          |       |
| Not low EYSPF score (reference)                       |                   |                          |      |                        |                          |       |
| Low EYSFP score                                       | 29.4*             | 14.4                     | 59.8 | 58.1*                  | 27.4                     | 123.0 |
| Gender: Female (reference)                            |                   |                          |      |                        |                          |       |
| Gender: Male                                          | 2.87*             | 1.56                     | 5.29 | 2.38*                  | 1.28                     | 4.41  |
| Child ethnicity: White British (reference)            |                   |                          |      |                        |                          |       |
| Pakistani Heritage                                    | 0.45*             | 0.27                     | 0.76 | 0.42*                  | 0.24                     | 0.71  |
| Other                                                 | 0.69              | 0.33                     | 1.41 | 0.63                   | 0.30                     | 1.32  |
| Receiving free school meals (reference)               |                   |                          |      |                        |                          |       |
| Not receiving free school meals                       | 2.29*             | 1.25                     | 4.19 | 2.39*                  | 1.30                     | 4.41  |
| Age (years) at GP data extract: Five (reference)      |                   |                          |      |                        |                          |       |
| Six                                                   | 1.60              | 0.54                     | 4.76 | 1.16                   | 0.38                     | 3.54  |
| Seven                                                 | 0.94              | 0.31                     | 2.80 | 0.67                   | 0.22                     | 2.05  |
| Eight plus                                            | 0.93              | 0.31                     | 2.82 | 0.71                   | 0.23                     | 2.19  |

\* = significant at the 0.05 level

**Supplementary material 2: Read codes for autism**

We used the Read codes below to identify children with a diagnosis of autism. This was supplemented by a free text search (which did not identify further cases).

| <b>Read code</b> | <b>Read code description</b>  |
|------------------|-------------------------------|
| <b>ASDs</b>      |                               |
| E140.00          | Infantile autism              |
| E140000          | Active infantile autism       |
| E140100          | Residual infantile autism     |
| E140.12          | Autism**                      |
| E140.13          | Childhood autism              |
| E140000          | Active infantile autism       |
| E140z00          | Infantile autism NOS          |
| Eu84000          | [X]Childhood autism           |
| Eu84011          | [X]Autistic disorder**        |
| Eu84012          | [X]Infantile autism           |
| Eu84100          | [X]Atypical autism            |
| Eu84z11          | [X]Autistic spectrum disorder |
| Eu84500          | [X]Asperger's syndrome**      |

**Supplementary material 3: The distribution of EYFSP scores for children with and without a diagnosis of autism spectrum disorder**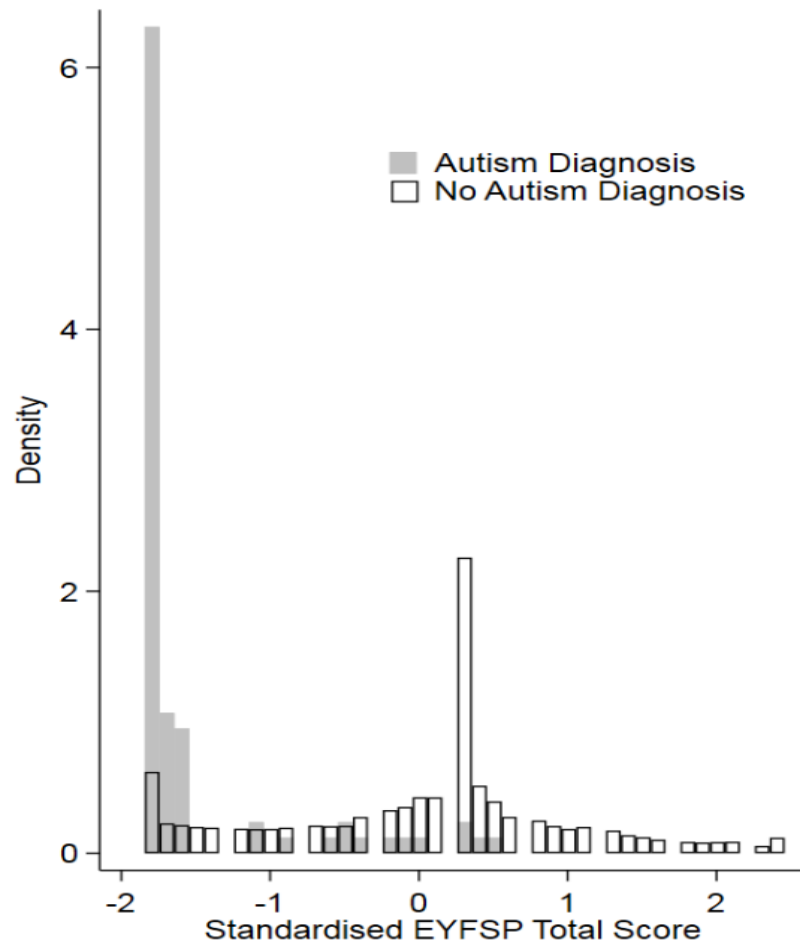

3

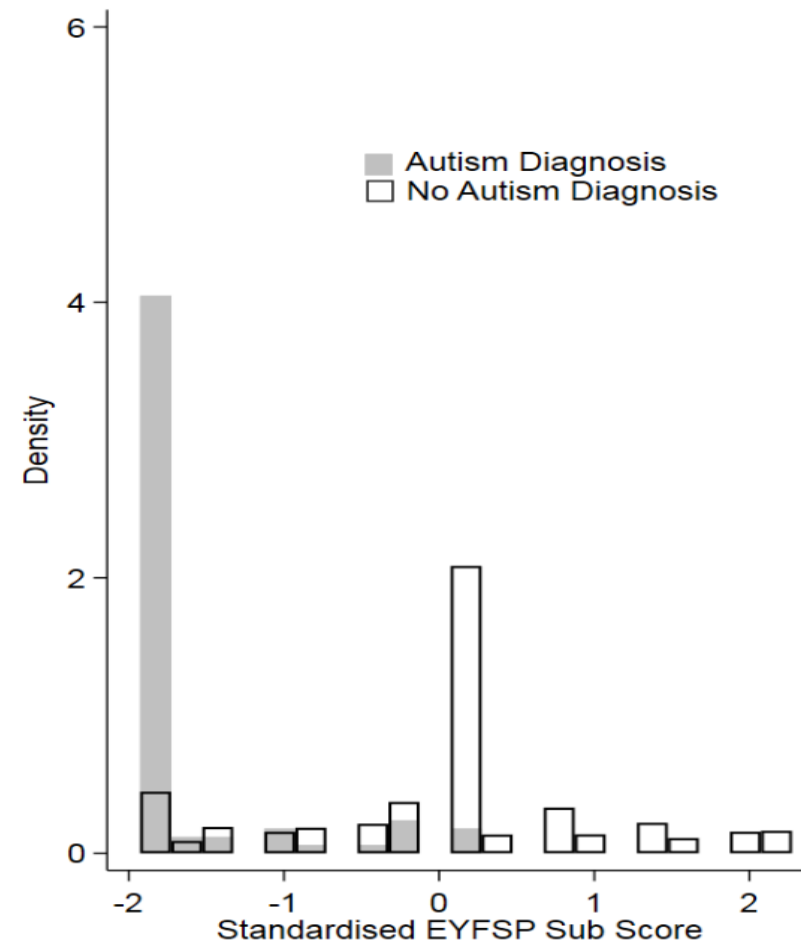

Supplement: inline-supplementary-material-1 [file inline-supplementary-material-1.pdf]
